# Issues and Updates

## ADA Events

### 58th Scientific Sessions

13–16 June 1998

Chicago, IL

**Sponsorship:** American Diabetes Association

**Contact:** American Diabetes Association, 1660 Duke St., Alexandria, VA 22314. Tel: 800-232-3472, select option 5. Fax: 703-549-1715. E-mail: meetings@diabetes.org.

### MODYs as Paradigm of the Pathogenesis of Type 2 Diabetes

5–8 November 1998

Scottsdale, Arizona

**Location:** Sunburst Resort

**Sponsorship:** American Diabetes Association

**Contact:** American Diabetes Association, 1660 Duke St., Alexandria, VA 22314. Tel: 800-232-3472, select option 5. Fax: 703-549-1715 or 703-683-1351. E-mail: meetings@diabetes.org.

### 46th Annual Postgraduate Course

22–24 January 1999

Orlando, Florida

**Sponsorship:** American Diabetes Association

**Contact:** American Diabetes Association, 1660 Duke St., Alexandria, VA 22314. Tel: 800-232-3472, select option 5. Fax: 703-549-1715 or 703-683-1351. E-mail: meetings@diabetes.org.

## Other Events

### 16th International Symposium on Diabetes and Nutrition

28–30 June 1998

Kolding, Denmark

**Sponsorship:** Diabetes and Nutrition Study Group of the European Association for the Study of Diabetes

**Contact:** Asst. Prof. Kjeld Hermansen, Dept. of Endocrinology and Metabolism, Aarhus Amtssygehus, Aarhus University Hospital, Tage-Hansens Gade 2, DK-8000 Aarhus, Denmark. Tel: 45-8949-7651. Fax: 45-8619-3807. E-mail: annemarie.kruse@aas.arhusamt.dk.

### Asia-Pacific Diabetes Epidemiology Training Course

10–18 July 1998

Seoul, Korea

**Sponsorship:** WHO Multinational Project for Childhood Diabetes

**Contact:** Dr. Hong Kyu Lee, Department of Internal Medicine, Seoul National University Hospital, 28 Yongondong, Chongno-ku, Seoul 110-744, Korea. Tel: 82-2-760-2266. Fax: 82-2-765-7966. E-mail: hkleemd@plaza.snu.ac.kr.

### XVII World Congress of the Transplantation Society

12–17 July 1998

Montreal, Canada

**Location:** Palais des Congrès

**Sponsorship:** The Transplantation Society

**Contact:** Lucy Felicissimo & Associates Inc., 12,449 rue Cousineau, Montreal, Quebec H4K 1P9, Canada. Fax: 514-334-5200.

### Endocrinology and Diabetes Update

18–19 July 1998

Grand Traverse, Michigan

**Location:** Grand Traverse Resort

**Sponsorship:** University of Michigan

**Contact:** Joyce Robertson, Registrar, Department of Medical Education Professions, P.O. Box 1157, Ann Arbor, MI 48106-1157. Tel: 734-763-1400 or 800-800-0666. Fax: 734-936-1641.

### Seventh World Congress of the International Pancreas & Islet Transplant Association

22–25 August 1999

Sydney, Australia

**Contact:** Congress Secretariat, GPO Box 2609, Sydney NSW Australia 2001. Tel: 612-9241-1478. Fax: 612-9251-3552.

E-mail: reply@icmsaust.com.au.

### Pancreatic $\beta$ -Cell and Islet Research

13–14 September 1998

S'Agaró (Girona), Spain

**Sponsorship:** European Association for the Study of Diabetes

**Contact:** Dr. I. Conget/Dr. J. Fernandez Alvarez, Endocrinology & Diabetes Unit, Hospital Clinic i Universitari, Villarroel 170, E 08036, Barcelona, Spain. Tel: 34-3-227-5411. Fax: 34-3-451-6638. E-mail: iconget@medicina.ub.es.

### Nutrition and Diabetes (Fall Symposium)

8–10 October 1998

Team Management of Diabetes

Thirteen 1-week sessions from January to December 1998

(Call for class dates.)

Minneapolis, MI

**Sponsorship:** International Diabetes Center

**Contact:** International Diabetes Center, Professional Education Center, 3800 Park Nicollet Blvd., Minneapolis, MN 55416-2699. Tel: 612-993-3393. Fax: 612-993-1302.

### Calgary 98: CDA Professional Conference and Annual Meetings

14–17 October 1998

Calgary, Alberta, Canada

**Location:** Calgary Convention Centre

**Sponsorship:** Canadian Diabetes Association

**Contact:** Alison Wynd, Manager, National Conference Services, Canadian Diabetes Association. Tel: 416-363-0177, ext. 298. Fax: 416-363-7465. E-mail: wynd@cda-nat.org.

### An Interdisciplinary Approach to the Diabetic Foot

8–10 January 1999

Pittsburgh, Pennsylvania

**Location:** The Doubletree Hotel

**Sponsorship:** The Western Pennsylvania Hospital and its affiliate, Joslin Center for Diabetes, and the Foot and Ankle Institute of Western Pennsylvania

**Contact:** Beth Sheedy, Residency Coordinator, The Foot and Ankle Institute of Western Pennsylvania, 4800 Friendship Ave., North Tower, First Floor, Pittsburgh, PA 15224. Tel: 412-688-7580. Fax: 412-681-9676.

### 15th Postgraduate Study in Diabetology

13 January to 12 June 2000

Zagreb, Croatia

**Sponsorship:** The Vuk Vrhovac Clinic for Diabetes, Endocrinology and Metabolic Diseases

**Contact:** Prof. Željko Metelko, MD, PhD, Medical Faculty, University of Zagreb, Dugi dol 4a, 10000 Zagreb, Croatia. Tel: 385-1-233-1480. Fax: 385-1-233-1515. E-mail: metelko@indija.idb.hr.
